# Supplementary material
Source: PubMed Central journal article supplement (PMC3954754)
Supplement: NIHMS542777-supplement-Supplement1.pdf [file NIHMS542777-supplement-Supplement1.pdf]

## Supplementary Appendix

This appendix has been provided by the authors to give readers additional information about their work.

Supplement to: Persaud D, Gay H, Ziemniak C, et al. Absence of detectable HIV-1 viremia after treatment cessation in an infant. *N Engl J Med* 2013;369:1828-35. DOI: 10.1056/NEJMoa1302976

# **HIV Remission Following Very Early Antiretroviral Therapy of an Infant**

Deborah Persaud, Hannah Gay, Carrie Ziemniak, Ya Hui Chen, Michael Piatak, Jr., Tae-Wook Chun, Matthew Strain, Douglas Richman, and Katherine Luzuriaga.

## **Table of Contents**

Supplementary Figure 1 .....2

Supplementary Figure 2 .....3

**Supplementary Figures**

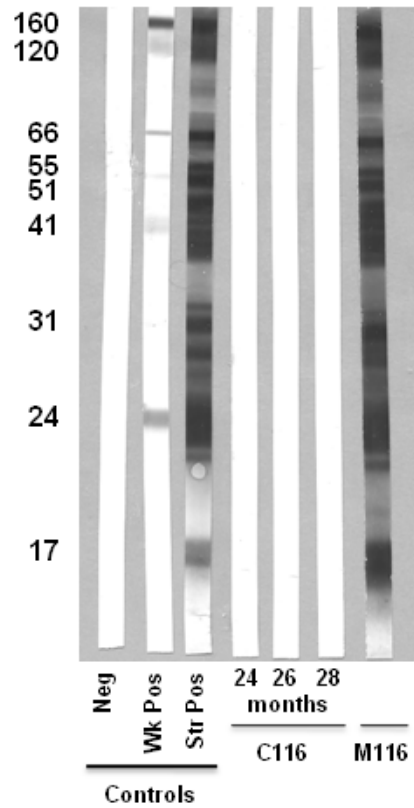

**Figure S1. Infant HIV-1 antibodies are not detectable by Western blot**

Lane 1, negative control; Lanes 2 and 3, positive controls; Lane 4, infant (C116) at 24 months; Lane 5, 26 months of age; Lane 6, 28 months of age; Lane 7, Maternal Western Blot test results.

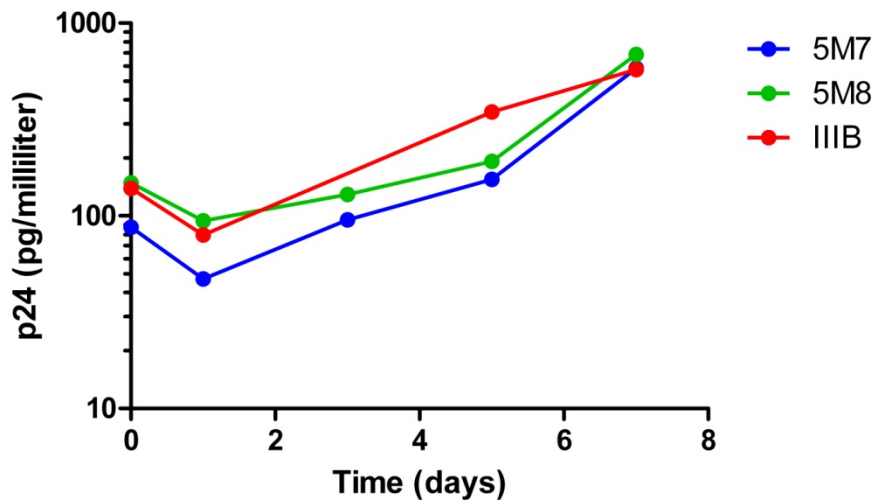

**Figure S2. Replication kinetics of maternal replication competent viral clones**

Fitness of viral isolates (5M7 and 5M8) from maternal peripheral blood in CD4+ T-cells from a healthy donor.; p24 production in culture supernatant was measured over the course of seven days compared with the reference strain IIIB.
